# Supplementary material
Source: PubMed Central journal article supplement (PMC8461554)
Supplement: jamaoncol-e213987-s001.pdf [file jamaoncol-e213987-s001.pdf]

## Supplementary Online Content

Aggarwal R, Rydzewski NR, Zhang L, et al. Prognosis associated with luminal and basal subtypes of metastatic prostate cancer. *JAMA Oncol*. Published online September 23, 2021.  
doi:10.1001/jamaoncol.2021.3987

**eFigure 1.** Clustering Before and After Batch Correction

**eFigure 2.** Tumor Location

This supplementary material has been provided by the authors to give readers additional information about their work.

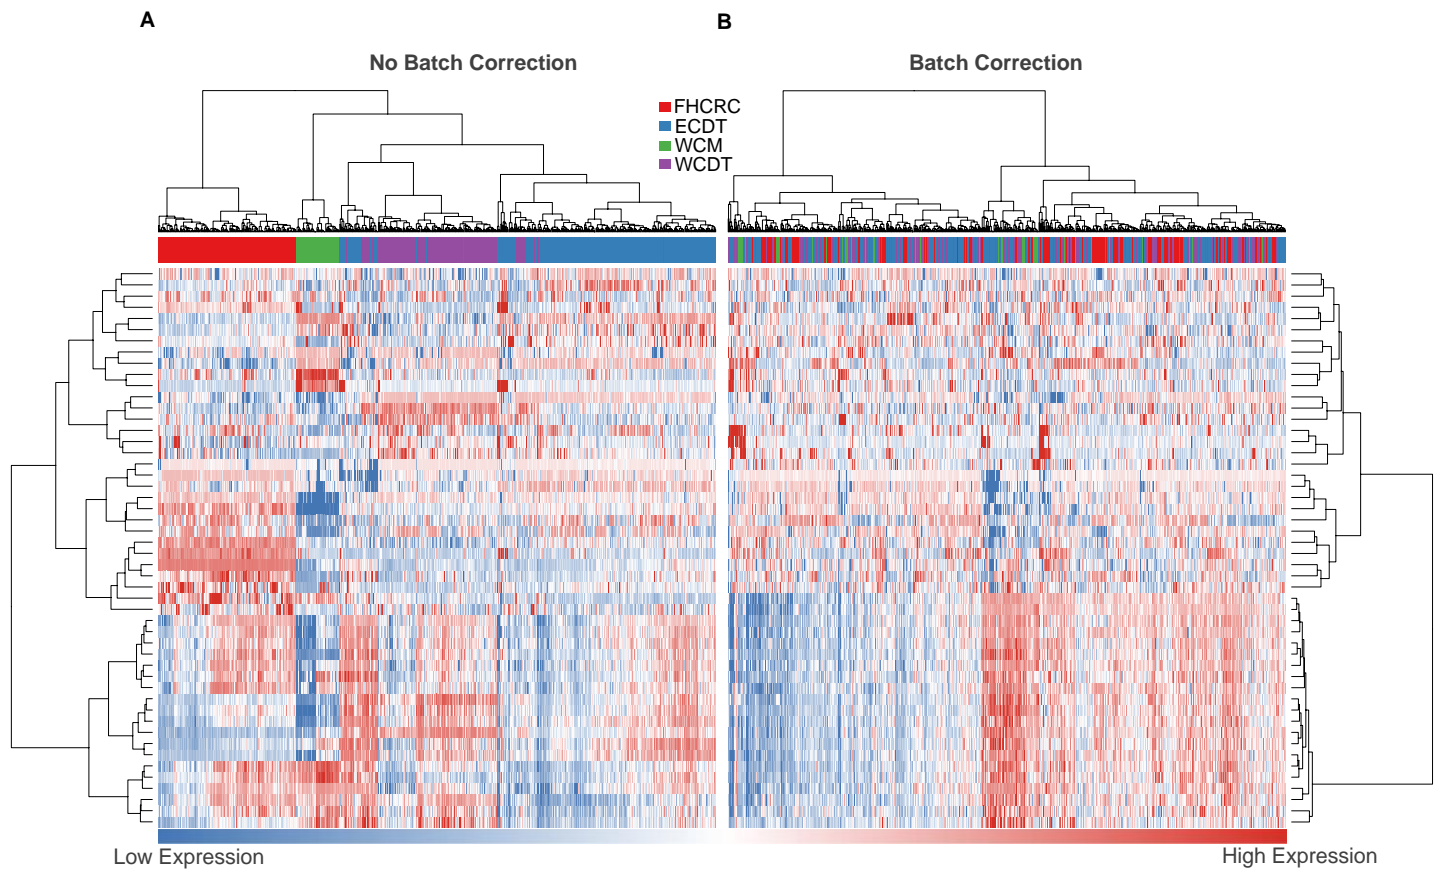

**eFigure 1: Clustering before and after batch correction.** Heatmaps depicting clustering of patient samples before (A) and after (B) batch correction.

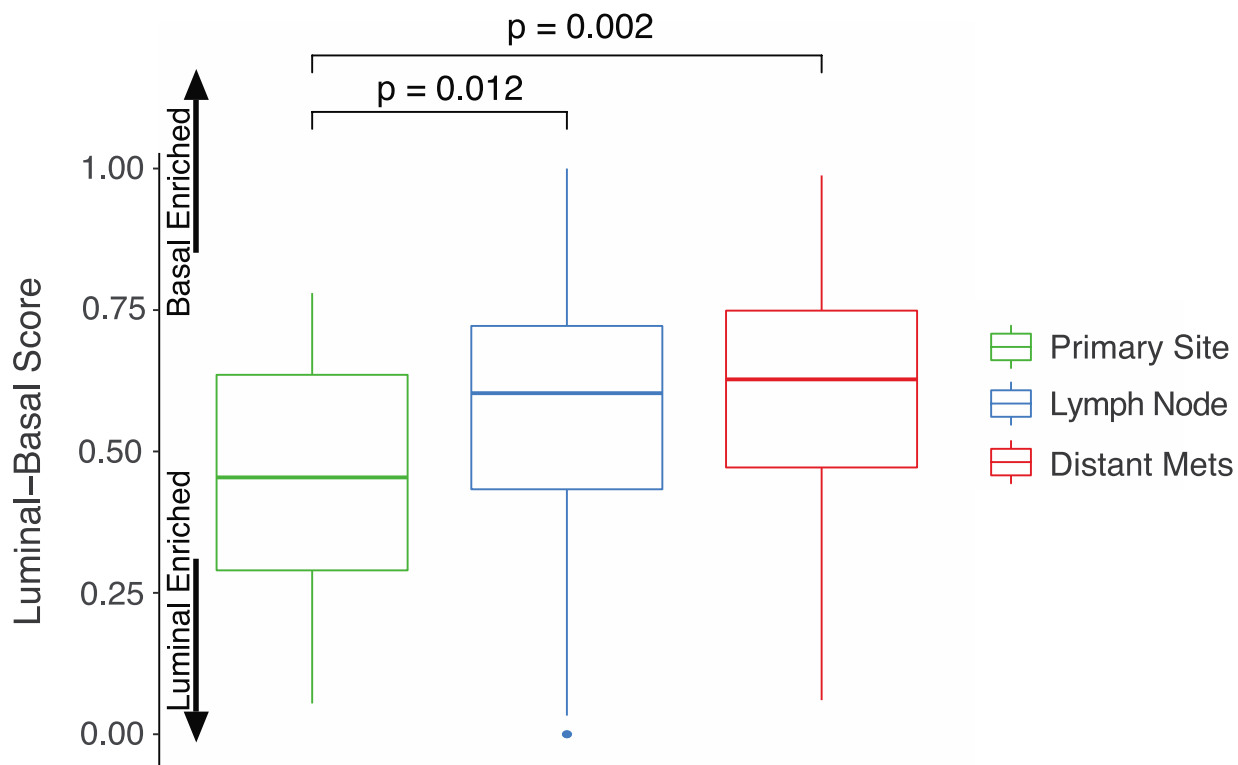

**eFigure 2: Tumor location.** Luminal-basal score of samples stratified by the biopsy location. A significant global difference in luminal-basal score based on biopsy site was identified (Kruskal-Wallis p-value = 0.002) with further BH-adjusted Wilcoxon signed rank testing p-values documented above.
